# Supplementary material
Source: Research Square preprint supplement (doi:10.21203/rs.3.rs-9784979/v1)

## SUPPLEMENTARY MATERIAL

### Multi-season assessment of planting-date-associated patterns in *Fusarium verticillioides* presence and fumonisin contamination in maize grains

Pérez-Pizá M. C., Vicente S., Sautua F.J., Mouselgne F., Jecke F., Vago M. E., Carmona M. A., Stenglein S. A.

**Table S1.** Sowing, flowering, and harvest dates of early- and late-planted maize hybrid field trials conducted at San Antonio de Areco (INTA AER San Antonio de Areco, Buenos Aires, Argentina) across three growing seasons (GS1 = 2020–2021; GS2 = 2021–2022 for early planting and 2022–2023 for late planting; GS3 = 2023–2024).

| Season | Planting type | Previous crop        | Sowing date | Flowering period | Harvest date   |
|--------|---------------|----------------------|-------------|------------------|----------------|
| GS1    | Early         | Vetch cover crop     | 5 Oct 20    | 16–20 Dec 20     | Late March 21  |
| GS2    | Early         | Oat for grazing      | 5 Oct 21    | 15–20 Dec 21     | Early April 22 |
| GS3    | Early         | Wheat/second soybean | 28 Sep 23   | 20–27 Dec 23     | Early April 24 |
| GS2    | Late          | First soybean        | 12 Dec 20   | 18–23 Feb 21     | Early June 21  |
| GS2    | Late          | First soybean        | 29 Dec 22   | 1–10 Mar 23      | Early June 23  |
| GS3    | Late          | Forage oat           | 14 Dec 23   | 11–16 Feb 24     | Early June 24  |

**Table S2.** Soil chemical properties at sowing for early- and late-planted maize hybrid field trials conducted at San Antonio de Areco (INTA AER San Antonio de Areco, Buenos Aires, Argentina) across three growing seasons (GS1 = 2020–2021; GS2 = 2021–2022 for early planting and 2022–2023 for late planting; GS3 = 2023–2024).

| Season | Planting type | pH  | Organic matter (%) | P Bray (mg kg <sup>-1</sup> ) | N-NO <sub>3</sub> <sup>-</sup> (0–20 cm) | N-NO <sub>3</sub> <sup>-</sup> (20–40 cm) | N-NO <sub>3</sub> <sup>-</sup> (40–60 cm) |
|--------|---------------|-----|--------------------|-------------------------------|------------------------------------------|-------------------------------------------|-------------------------------------------|
| GS1    | Early         | 5.6 | 3.3                | 16                            | 14.8                                     | 20.2                                      | 10.1                                      |
| GS1    | Late          | 5.6 | 3.3                | 16                            | 14.8                                     | 20.2                                      | 10.1                                      |
| GS2    | Early         | 5.7 | 3.59               | 16                            | 19.2                                     | 15.5                                      | 7.75                                      |
| GS2    | Late          | 5.6 | 3.5                | 13.3                          | 16.3                                     | 7.2                                       | 3.6                                       |
| GS3    | Early         | 5.7 | 3.19               | 11.5                          | 14.1                                     | 7.6                                       | —                                         |
| GS3    | Late          | 5.8 | 3.9                | 12                            | 9.1                                      | 6.3                                       | —                                         |

**Table S3.** Presence of maize hybrids in early- and late-planted trials (INTA San Antonio de Areco) across three growing seasons (GS1 = 2020–2021; GS2 = 2021–2022 for early planting and 2022–2023 for late planting; GS3 = 2023–2024). A check mark (✓) indicates participation of a hybrid in each trial. Totals per trial: Early = 13 (GS1), 9 (GS2), 4 (GS3), 26 overall; Late = 13 (GS1), 5 (GS2), 2 (GS3), 20 overall.

| Hybrid | Early |     |     | Late |     |     |
|--------|-------|-----|-----|------|-----|-----|
|        | GS1   | GS2 | GS3 | GS1  | GS2 | GS3 |
| A      | ✓     |     |     | ✓    |     |     |
| B      | ✓     | ✓   | ✓   | ✓    | ✓   | ✓   |
| C      | ✓     | ✓   |     | ✓    |     |     |
| D      | ✓     | ✓   |     | ✓    | ✓   |     |
| E      | ✓     |     |     | ✓    |     |     |
| F      | ✓     | ✓   |     | ✓    |     |     |
| G      | ✓     | ✓   | ✓   | ✓    | ✓   |     |
| H      | ✓     |     |     | ✓    |     |     |
| I      | ✓     | ✓   | ✓   | ✓    | ✓   |     |
| J      | ✓     |     |     | ✓    |     |     |
| K      | ✓     | ✓   | ✓   | ✓    | ✓   |     |
| L      | ✓     | ✓   |     | ✓    |     | ✓   |
| M      | ✓     | ✓   |     | ✓    |     |     |

**Table S4.** Flowering dates and critical flowering period (–7/+21 days; ~28 days) for early and late plantings across three growing seasons (GS1 = 2020–2021; GS2 = 2021–2022 for early planting and 2022–2023 for late planting; GS3 = 2023–2024), showing the flowering window and the mean temperature and precipitation during the corresponding critical period.

| Planting Date | Campaign | Flowering period | Critical period (–7/+21) |             |             |
|---------------|----------|------------------|--------------------------|-------------|-------------|
|               |          |                  | Dates                    | Mean T (°C) | Precip (mm) |
| Early         | GS1      | 16–20 Dec 20     | 11 Dec 20 – 8 Jan 21     | 24.9        | 34.5        |
|               | GS2      | 15–20 Dec 21     | 10 Dec 21 – 7 Jan 22     | 27.0        | 22.5        |
|               | GS3      | 20–27 Dec 23     | 16 Dec 23 – 13 Jan 24    | 23.5        | 93.2        |
| Late          | GS1      | 18–23 Feb 21     | 13 Feb – 13 Mar 21       | 23.4        | 36.2        |
|               | GS2      | 1–10 Mar 23      | 26 Feb – 26 Mar 23       | 27.8        | 29.5        |
|               | GS3      | 11–16 Feb 24     | 6 Feb – 5 Mar 24         | 24.7        | 112.7       |

**Table S5.** Overview of studies examining the relationship between *Fusarium verticillioides* presence/colonization metrics in maize grain and fumonisins (FBs) accumulation.

| <b>Study</b>              | <b>Type of measurement related to <i>Fusarium verticillioides</i></b>                     | <b>Outcome regarding correlation with FBs</b>                                                                       |
|---------------------------|-------------------------------------------------------------------------------------------|---------------------------------------------------------------------------------------------------------------------|
| Cao et al., 2014          | Incidence in grains (infection and infestation), and ergosterol content                   | Strong positive correlation with infection, weak correlation with infestation, no correlation with ergosterol       |
| Munhoz et al., 2015       | Incidence and severity of ear rot                                                         | Positive correlation, but with high interannual variability                                                         |
| Silva et al., 2017        | Fungal counts (CFU g <sup>-1</sup> ) in grain                                             | No correlation                                                                                                      |
| van Rensburg et al., 2017 | Fungal biomass (determined by qPCR)                                                       | Positively related, but the magnitude of FBs synthesis per unit biomass depends strongly on environmental variables |
| Links et al., 2019        | Fungal biomass (quantified by qPCR), ear rot severity                                     | Strong positive correlations                                                                                        |
| Castañares et al., 2019   | Incidence in ears                                                                         | Positive but weak or inconsistent correlation                                                                       |
| Krnjaja et al., 2019      | Incidence in ears                                                                         | Some positive correlations, but dependent on year and hybrid                                                        |
| Ponce-García et al., 2020 | Fungal counts (CFU g <sup>-1</sup> ) in grain                                             | No correlation; hybrid genetics strongly influenced outcomes                                                        |
| Arias-Martín et al., 2021 | Quantification of fungal DNA in grain                                                     | Generally no consistent correlation                                                                                 |
| Pérez-Pizá et al., 2024   | Fungal counts in grains (NFv; CFU g <sup>-1</sup> ); incidence in grains (infection, IFv) | Positive correlations                                                                                               |

## FIGURES

**Fig. S1.** Three-dimensional response surfaces showing the combined effects of mean temperature and accumulated precipitation during the critical flowering period on A) fumonisins (Total FB) accumulation and B) *Fusarium verticillioides* (NFv) colony counts for early and late plantings across three growing seasons (GS1 = 2020–2021; GS2 = 2021–2022 for early planting and 2022–2023 for late planting; GS3 = 2023–2024)

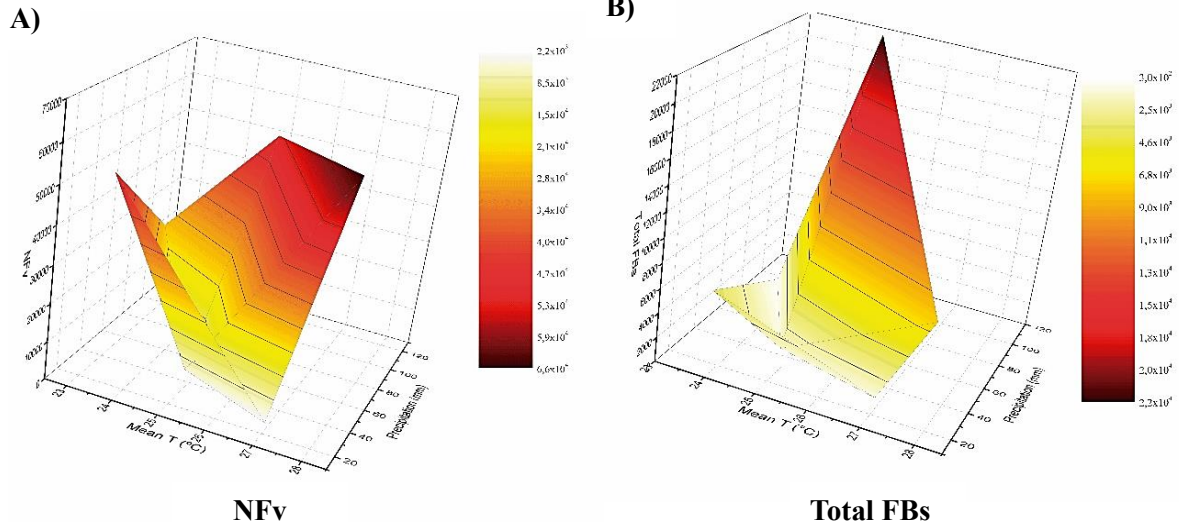

**Fig. S2.** Meteorological conditions during the early planting period field experiments of maize conducted at San Antonio de Areco (AER INTA San Antonio de Areco), Buenos Aires, Argentina, across three growing seasons: A) 2020–2021 (GS1); B) 2021–2022 (GS2); C) 2023–2024 (GS3). Bars represent monthly precipitation (black bars, corresponding to the experimental period; open bars, long-term historical means), while lines indicate maximum (red), mean (black), and minimum (blue) monthly air temperatures. Historical precipitation data correspond to the periods 1982–2019, 1982–2020, and 1982–2022 for GS1, GS2 and GS3, respectively. Meteorological data were obtained from the NASA POWER Data Access Viewer (<https://power.larc.nasa.gov/data-access-viewer/>).

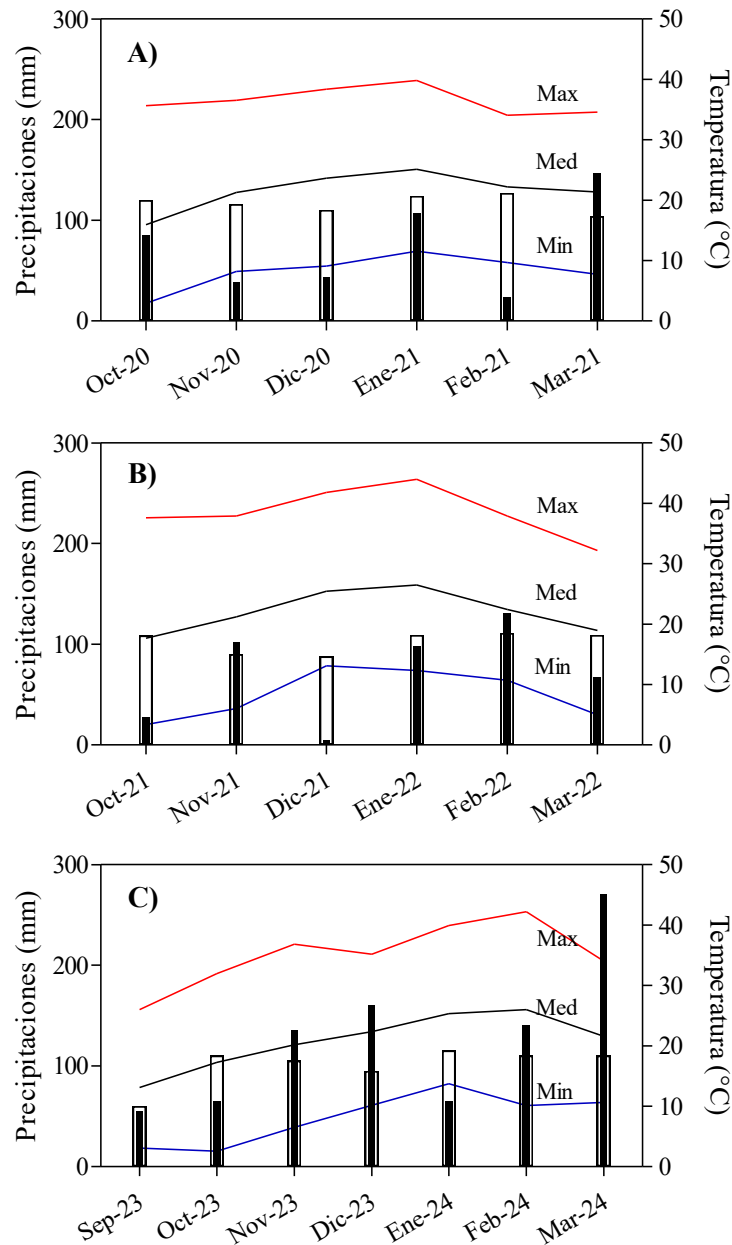

**Fig. S3.** Meteorological conditions during the early planting period field experiments of maize conducted at San Antonio de Areco (AER INTA San Antonio de Areco), Buenos Aires, Argentina, across three growing seasons: A) 2020–2021 (GS1); B) 2022–2023 (GS2); C) 2023–2024 (GS3). Bars represent monthly precipitation (black bars, corresponding to the experimental period; open bars, long-term historical means), while lines indicate maximum (red), mean (black), and minimum (blue) monthly air temperatures. Historical precipitation data correspond to the periods 1982–2019, 1982–2020, and 1982–2022 for GS1, GS2 and GS3, respectively. Meteorological data were obtained from the NASA POWER Data Access Viewer (<https://power.larc.nasa.gov/data-access-viewer/>).

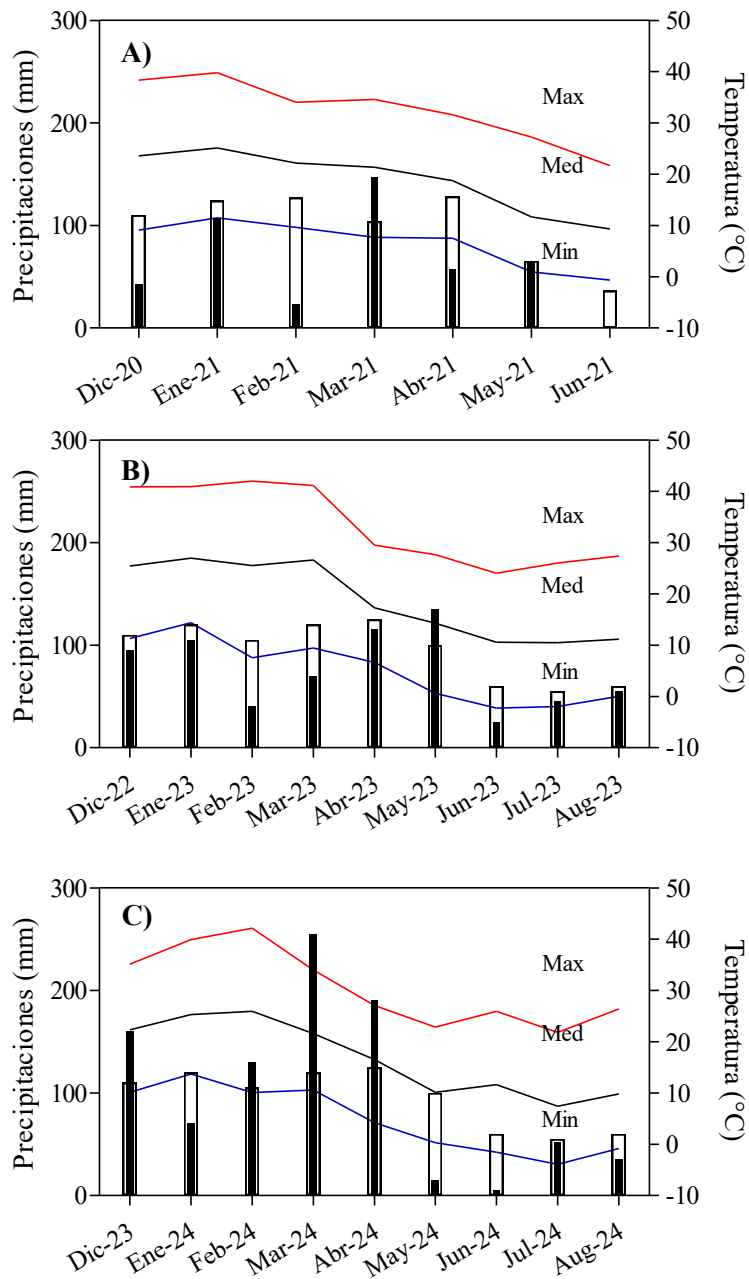

Supplement: Supplementary file 1 [file 4dfc07d559a261df431fd306.pdf]
